1           **CAR T Cells Secreting IL18 Augment Antitumor Immunity and**  
2           **Increase T Cell Proliferation and Costimulation**

3    Authors: Biliang Hu<sup>1\*</sup>, Jiangtao Ren<sup>1</sup>, Yanping Luo<sup>1</sup>, Brian Keith<sup>1,2</sup>, Regina M. Young<sup>1</sup>, John  
4    Scholler<sup>1</sup>, Yangbing Zhao<sup>1</sup>, Carl H. June<sup>1,3,4,\*</sup>

5    Affiliations:

6    <sup>1</sup>Center for Cellular Immunotherapies, Abramson Cancer Center, Perelman School of Medicine,  
7    University of Pennsylvania, Philadelphia, PA, USA

8    <sup>2</sup>Department of Cancer Biology, Abramson Cancer Center, Perelman School of Medicine,  
9    University of Pennsylvania, PA, USA

10   <sup>3</sup>Department of Pathology, Perelman School of Medicine, University of Pennsylvania  
11   Philadelphia, PA, USA

12   <sup>4</sup>Lead contact

13   \*Correspondence: hbiliang@mail.med.upenn.edu (B.H.), cjune@exchange.upenn.edu (C.H.J.)

14

15

16

17

## 18 **Abstract**

19 Interleukin 18 (IL18) is known to induce the expression of interferon- $\gamma$  (IFNG), but its effects on T  
20 cell proliferation and costimulation are not completely understood. In this study, we  
21 demonstrate that ectopic expression of IL18 in CART cells caused significant T cell proliferation  
22 *in vitro* and *in vivo*, and enhanced antitumor effects in xenograft models. Moreover, IL18  
23 mediated T cell expansion required neither tumor antigen nor CAR expression, and produced  
24 severe GVHD in NSG mice. Furthermore, recombinant IL18 costimulated IFNG secretion and  
25 proliferation of anti-CD3 beads treated T cells. Interestingly, IL18 costimulation could expand  
26 purified CD4 T cells, but not CD8 T cells. However, CD8 T cells proliferated greater than CD4 T  
27 cells in magnitude within bulk T cells, suggesting CD4 help effect was involved. Using  
28 CRISPR/Cas9 gene editing, we confirmed that IL18-driven expansion was both TCR and IL18  
29 receptor (IL18R) dependent. Importantly, we demonstrated that TCR-deficient, IL18-expressing  
30 CD19 CART cells exhibited remarkable proliferation and persistent antitumor activity against  
31 CD19-expressing tumor cells *in vivo*, without eliciting any detectable GVHD symptom. Finally, we  
32 describe APACHE T cells, a novel strategy for coupling IL18 expression in CART cells to antigen  
33 stimulation, thereby limiting potential toxicity associated with persistent IL18 production. In  
34 sum, our study supports human IL18 as a T cell costimulatory cytokine for fueling CART therapy.

35

## 36 **Keywords**

37 IL18, CAR, TCR, Costimulation, GVHD, CRISPR/Cas9, RNA electroporation, Knockout,  
38 Immunotherapy, NFAT

39

40 **Abbreviation:** T Cell Receptor –**TCR**; Chimeric Antigen Receptor –**CAR**; IL18 producing CART –**IL18-**  
41 **CART**; IL18 producing CD19 CART –**CD19-IL18 CART**; IL18 producing SS1 CART –**SS1-IL18 CART**; Tumor  
42 Infiltrating Lymphocytes –**TIL**; Graft-Versus-Host Disease –**GVHD**; Clustered regularly interspaced  
43 short palindromic repeats –**CRISPR**; CRISPR associated protein 9 –**Cas9**; Knockout–**KO**; IL18 Receptor  
44 –**IL18R**; Nuclear Factor of Activated T-cells–**NFAT**; artificial Antigen Presenting Cells –**aAPC**.

45

46

47

48

49

50

## 51 Introduction

52 Following the initial reports of clinical success using chimeric antigen receptor (CAR) T cell  
53 therapy to treat B cell leukemia and lymphoma (Kochenderfer et al., 2010; Porter et al., 2011),  
54 there have been intense efforts to improve the design and clinical translation of CART cells  
55 (Dotti et al., 2014; Jensen and Riddell, 2014; Kalos and June, 2013). It is well established that T  
56 cell receptor (TCR) engagement and costimulatory signaling provide the critical signals that  
57 regulate T cell activation, proliferation and cytolytic functions (Chen and Flies, 2013). In addition  
58 to TCR and costimulatory signals, exogenous cytokines also play a fundamental role in  
59 modulating T cell function (Curtsinger and Mescher, 2010), as reflected in the influence of  
60 cytokines produced by CD4<sup>+</sup> T helper cells on the activity of CD8<sup>+</sup> cytotoxic T cells (Bevan, 2004).  
61 For example, interleukin 2 (IL2) promotes clonal expansion of effector T cells in response to  
62 antigen stimulation, and is also required to maintain suppressive regulatory T (Treg) cell-  
63 mediated immune tolerance (Boyman and Sprent, 2012).

64 CART cells are among the most promising of multiple adoptive T cell transfer-based  
65 immunotherapies currently under development (Harris and Kranz, 2016; Hinrichs and Rosenberg,  
66 2014; Lu et al., 2014; Robbins et al., 2013). The manufacture of sufficient tumor-specific T cells  
67 in a clinical setting has relied on the use of exogenous cytokines, including IL2, IL7 and IL15, to  
68 promote *ex vivo* expansion of genetically engineered T cells (Cha et al., 2010; Cieri et al., 2013).  
69 In addition, IL21 has been shown to promote expansion and engraftment of adoptively  
70 transferred T cells (Chapuis et al., 2013).

71 Although many immune cytokines have been evaluated for their ability to promote anti-tumor  
72 immunity when delivered exogenously (Dranoff, 2004; Lee and Margolin, 2011), reports of  
73 toxicity and/or lack of efficacy have limited their success. Several attempts to replace exogenous  
74 cytokine treatment with T cell-autonomous cytokine production have been reported. For  
75 example, tethering IL15 to CART cells was shown to enhance T cell persistence and antitumor  
76 activity (Hurton et al., 2016); however, there are concerns that this approach could lead to  
77 transformation of the T cells (Hsu et al., 2007; Sato et al., 2011). Similarly, IL12-expressing T cells  
78 have been investigated in multiple preclinical studies (Chinnasamy et al., 2012; Chmielewski et  
79 al., 2014; Chmielewski et al., 2011; Koneru et al., 2015; Pegram et al., 2012; Zhang et al., 2015),  
80 and IL12-expressing tumor infiltrating lymphocytes (TIL) were recently used to treat melanoma  
81 patients (Zhang et al., 2015). Although IL12-expressing TIL therapy resulted in effective anti-  
82 tumor response, toxicity from persistent, elevated serum IL12 concentrations was observed.  
83 More recently, interferon- $\beta$  (IFN $\beta$ ) has shown efficacy in bridging innate and adaptive immune  
84 responses (Yang et al., 2014), and may be an attractive option for engineering cytokine  
85 producing CART in future (Zhao et al., 2015).

86 We hypothesized that including an IL18 gene expression cassette in the CAR lentiviral vector  
87 might overcome the requirement for exogenous cytokine stimulation, and promote improved  
88 antitumor CART cell effects. IL18 was initially characterized as an inducer of interferon- $\gamma$  (IFN $\gamma$ )  
89 expression in T cells (Nakamura et al., 1993; Nakamura et al., 1989), and was shown to activate

90 lymphocytes and monocytes, without eliciting severe dose limiting toxicity, in a previous clinical  
91 study (Robertson et al., 2006). The combination of IL18 with IL12 treatment promotes Th1 and  
92 NK cell responses (Nakanishi et al., 2001), but also induces lethal toxicity in murine models  
93 (Carson et al., 2000; Osaki et al., 1998), reflecting the dynamic tension between achieving high  
94 potency and inducing toxicity in cytokine based immunotherapies. Despite initial indications that  
95 IL18 treatment alone may be only minimally effective in boosting anti-tumor immunity (Osaki et  
96 al., 1998), we previously reported that recombinant human IL18 could significantly enhance  
97 engraftment of human CD8 T cells in a xenograft model (Carroll et al., 2008).

98 In the current study, we demonstrate that T-cell autonomous IL18 expression, in combination  
99 with CAR or TCR signaling, promotes significant T cell proliferation *in vitro* and *in vivo*. Moreover,  
100 IL18 mediated T cell expansion in xenograft model required neither tumor antigen nor CAR  
101 expression, and produced severe GVHD in NSG mice. Interestingly, CD4+ T cells expanded  
102 preferentially in response to IL18 costimulation. Using CRISPR/Cas9 gene editing, we confirmed  
103 that IL18-dependent T cell expansion was both TCR and IL18 receptor (IL18R) dependent.  
104 Importantly, we demonstrated that TCR-deficient, IL18-expressing CD19 CART cells exhibited  
105 remarkable proliferation and persistent antitumor activity against CD19-expressing tumor cells  
106 and did not cause GVHD *in vivo*. These data support the redefinition of human IL18 as a T cell  
107 costimulatory cytokine and the utility of engineering CART cells to express IL18. We further  
108 describe an inducible expression system that couples IL18 expression levels to CAR stimulation,  
109 thereby reducing potential toxic effects of persistent IL18 expression in the absence of tumor  
110 antigen. Collectively, these studies identify a novel approach to enhancing CART cell expansion  
111 *in vivo*, which is a critical determinant of successful CART cancer immunotherapy.

112

113

## 114 **Results**

### 115 **IL18 enhances proliferation of polyclonal antigen-specific and non-specific CAR T cells *in vivo***

116 To test the hypothesis that elevated IL18 signaling can enhance the anti-tumor effects of CART  
117 cell therapy, we introduced a gene expression cassette encoding human IL18 (or GFP as a  
118 negative control) into a previously described anti-mesothelin (SS1) CAR lentiviral construct (SS1-  
119 IL18) (Figure 1A). Similarly, the IL18 gene cassette was introduced into an anti-CD19 CAR  
120 construct (CD19-IL18) to serve as a control for antigen-specific effects (Figure 1A). SS1-IL18 CART  
121 cells efficiently expressed SS1 CAR and secreted active human IL18 into the culture medium, as  
122 assessed using an IL18 reporter cell line (Figure 1-figure supplement 1A,B,C).

123 Interestingly, elevated IL18 expression enhanced the lytic activity of SS1-CART cells when  
124 cultured *in vitro* with the mesothelin-expressing BxPC3 pancreatic tumor cell line (Figure 1-  
125 figure supplement 1D). As previous data indicates that recombinant human IL18 significantly  
126 enhances engraftment of human CD8 T cells in xenograft models (Carroll et al., 2008), we

127 investigated whether the IL18-expression could enhance CART cell-mediated antitumor effects  
128 *in vivo*. AsPC1 cells expressing click beetle green (CBG) and GFP reporter proteins were injected  
129 into NSG mice to generate xenograft tumors. Tumor-bearing mice were then injected with SS1,  
130 SS1-IL18, CD19 or CD19-IL18 CART cells, and tumor burden was monitored by bioluminescence.  
131 Surprisingly, both CD19-IL18 and SS1-IL18 CART cells suppressed tumor progression while  
132 inducing significant loss of body weight (Figure 1B), and CD19-IL18 or SS1-IL18 T cells were  
133 dramatically expanded 62-fold to 13993 cells/ $\mu$ l, or 74-fold to 38211 cells/ $\mu$ l, respectively  
134 (Figure 1C). Moreover, the serum IL18 concentration was increased to 44291pg/ml in SS1-IL18  
135 CART cells (Figure 1C). These results indicate that CART cell-autonomous IL18 expression can  
136 drive expansion of both antigen-specific and non-specific CART cells in NSG mice.

137 To further analyze the specific effects of IL18 expression on CART cell proliferation, splenic T  
138 cells were analyzed for CAR expression by flowcytometry. Interestingly, in mice receiving SS1  
139 CART cells, 96.4% of the *in vivo* expanded CD8 T cells were CAR+, whereas only 50% of the CD8+  
140 T cells in mice receiving SS1-IL18 CART cells were CAR+ (Figure 1D,E). This expansion is more  
141 favorable to SS1 CAR+ T cells, as only approximately 24% of the expanded human T cells were  
142 CAR+ in mice receiving CD19-IL18 CART cells (Figure 1D,E). The percentage of CAR+ cells within  
143 CD4 or CD8 subsets are summarized in Figure 1E. These results suggested that IL18 promotes  
144 proliferation of both CAR+ and CAR- T cells in autocrine and paracrine modes. Phenotyping of  
145 TCR $\beta$  (TCRB) variants on expanded T cells reveals that all CART cell groups exhibit polyclonal  
146 expansion (Figure 1-figure supplement 2), suggesting that IL18 expression does not select for  
147 particular TCR specificities.

#### 148 **IL18 mediated T cell proliferation induces lethal GVHD**

149 Our observation that CD19-IL18 CART cells elicited antitumor activity and loss of body weight, as  
150 well as the expansion of untransduced T cells in mice receiving IL18-CART cells, suggested that  
151 IL18 expression in these contexts might promote severe GVHD, consistent with our previous  
152 report (Carroll et al., 2008). To test the severity of GVHD associated with IL18-CART cell therapy,  
153 we injected tumor-free NSG mice with either SS1 or SS1-IL18 CART cells, and monitored  
154 circulating human T cell levels, serum IL18 concentrations, body weight, and survival (Figure 1F).  
155 As SS1-IL18 CART cells expanded, mice exhibited significant loss of body weight, and started to  
156 die approximately 3 weeks after T cell injection (Figure 1F). Similarly, NSG mice bearing CD19-  
157 expressing Nalm6 tumors treated with CD19-IL18 CART showed dramatic expansion of human T  
158 cells in blood and spleen (Figure 1-figure supplement 3A,B). Remarkably, mice bearing AsPC1  
159 cells succumbed quickly following injection with CD19-IL18 T cells, despite the absence of the  
160 CD19 tumor antigen on AsPC1 cells (Figure 1-figure supplement 3C). IL18 expression had no  
161 effect on the frequency of splenic regulatory T (Treg) cells (Figure 1-figure supplement 3D).  
162 Histological analyses confirmed that treatment with either SS1-IL18 and CD19-IL18 CART cells  
163 induced significant tumor destruction (Figure 1G). Immunohistochemical analysis for CD3  
164 expression revealed the presence of T cells in the tumor treated with IL18-CART (Figure 1H), and  
165 necropsy of mice receiving SS1-IL18 CART cells (Table S1), revealed remarkable GVHD in liver  
166 and lung and atypical lymphocyte infiltration in pancreas (Figure 1I).

167 Collectively, our results suggest that expressing IL18 in the context of CART cell therapy can  
168 enhance antitumor effects and xenogeneic GVHD, but may also produce unwanted toxicity due  
169 to TCR-mediated autoimmune effects in an autologous setting, or GVHD in an allogeneic setting.  
170 To optimize the use of IL18 in CART cell therapy, it was therefore important to dissect the  
171 contribution of TCR signaling to IL18-mediated CART cell effects *in vitro* and *in vivo*.

#### 172 **TCR activation and IL18 promotes CD4 helper dependent T cell expansion *in vitro* and *in vivo***

173 Based on our observation that IL18 expressing T cells proliferated in NSG mice independent of  
174 CAR activation, and produced xenogeneic GVHD, we speculated that a functional synergy exists  
175 between IL18 and TCR stimulation. To test this hypothesis *in vitro*, primary human T cells were  
176 stimulated using anti-CD3 beads and recombinant IL18. Whereas combined exposure to anti-  
177 CD3 beads and IL18 efficiently stimulated increases in T cell size and proliferation (Figure 2A,B),  
178 neither treatment alone was effective, although anti-CD3 beads alone caused intermediate  
179 increase in size without triggering T cell proliferation. These results were confirmed in T cells  
180 isolated from two normal donors (Figure 2C).

181 To better characterize IL18 activation of T cells, we collected the culture supernatants at D5  
182 from different conditions as indicated to analyze the profile of secreted cytokines. As expected,  
183 low concentrations of IL18 combined with anti-CD3 beads, significantly enhanced IFNG  
184 production compared to beads alone (Figure 2D). Although low concentrations of IL18 and anti-  
185 CD3 beads treatment enhanced IL2 production, maximal IL2 levels were at least 20-fold lower  
186 than those induced by standard anti-CD3/28 beads (Figure 2D). The production of other  
187 cytokines was generally comparable between CD3/IL18 and CD3/D28 activation (Figure 2-figure  
188 supplement 1). Multicolor flow phenotype revealed that IL18-expanded T cells had a primarily  
189 central memory (CM) phenotype (CCR7+CD45RO+), similar to that obtained with anti-CD3/28  
190 beads (Figure 2-figure supplement 2).

191 To address the specific roles of T cell subsets in these responses, T cells expanded by standard  
192 anti-CD3/CD28 beads were sorted by magnetic-activated cell sorting (MACS) to generate CD4  
193 and CD8 subpopulations. CD8 T cells failed to proliferate after restimulation with IL18 and anti-  
194 CD3 beads despite a significant increase in size, and addition of IL2 had no additional effect  
195 (Figure 2E,F). In sharp contrast, CD4 T cells or bulk T cells restimulated with IL18 and anti-CD3  
196 beads proliferated efficiently, at a level comparable to that of combined CD4+CD8 T cells  
197 following CD3/CD28 restimulation. Restimulated CD4 and CD8 T cells displayed transiently  
198 elevated central memory (CM) markers, but ultimately expressed a primarily effector memory  
199 (EM) phenotype (Figure 2-figure supplement 3A), similar to that observed for restimulated IL18-  
200 CART cells (Figure 2-figure supplement 3B).

201 GFP-IL18 expressing CD8 T cells also failed to expand *in vivo* following injection into NSG mice  
202 (Figure 2G). In contrast, GFP-IL18 expressing CD4 or bulk T cells exhibited greater than 400-fold  
203 expansion between days 15 to 23 post T cell injection (Figure 2G), and were associated with  
204 enlarged spleens (Figure 2H). The number of expanded CD4 T cells was comparable whether

205 pure CD4 T cells or total T cells were injected, suggesting that CD8 T cells do not have a  
206 significant effect on CD4 T cell expansion (Figure 2I). Interestingly, CD8 T cells proliferated  
207 greater than CD4 T cells in magnitude within bulk T cells, suggesting CD4 help effect was  
208 involved (Figure 2J).

209 Serum cytokine levels were determined in mice receiving CD4, CD8, or bulk T cells expressing  
210 GFP-IL18, or control GFP T cells. Consistent with our *in vitro* results, serum IL18 levels increased  
211 in the GFP-IL18 T cell and GFP-IL18 CD4 T cell populations, but not in the isolated GFP-IL18 CD8 T  
212 cell population (Figure 2K). IFNG levels also increased in proportion to T cell expansion (Figure  
213 2L), and GM-CSF levels were significantly elevated in the expanding GFP-IL18 T cell and GFP-IL18  
214 CD4 T cell populations, whereas other cytokines failed to show large changes (Figure 2M). In  
215 summary, these results suggested that IL18 acts as a costimulatory cytokine that interacts  
216 synergistically with TCR activation to drive efficient T cell proliferation, largely dependent on  
217 effects through CD4 helper T cells.

### 218 **CAR or TCR signaling is required for IL18 mediated T cell proliferation *in vitro* or *in vivo***

219 To first evaluate the effect of IL18 coexpression on CART cell proliferation *in vitro*, we deleted  
220 TCR mediated allogeneic effect in SS1-IL18 and CD19-IL18 CART cells using CRISPR/Cas9 gene  
221 editing as previously described (Ren et al., 2016). TCR KO IL18-CART cells had only marginally  
222 enhanced expansion following CD3/CD28 beads activation and RNA electroporation (Figure 3A).  
223 When stimulated with irradiated K562 cells expressing cognate antigen and exogenous IL2, SS1-  
224 IL18 CART cells displayed significantly increased proliferation relative to SS1 CART cells (Figure  
225 3B), which were producing high level of IFNG and IL2, and polyclonal in TCRB variants  
226 distribution (Figure 3-figure supplement 1A,B,C). However, CD19-IL18 CART cells expanded  
227 slightly better than the CD19 CART cell control (Figure 3C). Interestingly, IL18 expression  
228 promoted a modest increase in proliferation in both TCR-deficient SS1-IL18 and CD19-IL18 CART  
229 cells relative to their TCR wild type counterparts (Figure 3B,C,D). Robust IL18 secretion was  
230 observed in all cases (Figure 3E, Figure 3-figure supplement 2A,B), while IL18-CART displayed  
231 enhanced cytokine production of IFNG and several others (Figure 3-figure supplement 2C). The  
232 observation of extended proliferation in SS1-IL18 CART should be attributed to antigen  
233 independent activation of SS1 CAR as previously found (Frigault et al., 2015). Moreover, the loss  
234 of proliferation in TCR-deficient SS1-IL18 CART cells suggested that TCR structure might be  
235 necessary to maintain the antigen independent activation of SS1 CAR. Nevertheless, this data  
236 strongly suggested that IL18 could drive persistent T cell proliferation in presence of continuous  
237 CAR activation *in vitro*.

238 To test whether continuous TCR activation by mouse MHC molecules was required for general  
239 IL18-mediated T cell expansion *in vivo*, NSG mice were injected with TCR+ and TCR- GFP-IL18 T  
240 cells. TCR+ GFP-IL18 expressing T cells expanded dramatically compared to TCR+ GFP control T  
241 cells, whereas TCR- GFP-IL18 expressing T cells showed negligible IL18-induced expansion  
242 relative to controls (Figure 3F,G). In addition, flowcytometry analysis of spleen cells indicated  
243 that TCR+ GFP-IL18 expressing T cells displayed high levels of the IL18 receptor (IL18R) (Figure 3-

244 figure supplement 3A), and displayed a primarily effector memory phenotype (Figure 3-figure  
245 supplement 3B). Collectively these data indicate that CAR or TCR activation is required for IL18-  
246 mediated T cell proliferation *in vitro* or *in vivo*, respectively.

#### 247 **IL18 receptor is required for cell-autonomous IL18-mediated T cell expansion *in vivo***

248 To further investigate the synergy between IL18 and TCR signaling, we generated IL18R $\alpha$  (IL18RA)  
249 deficient T cells using CRISPR/Cas9 mediated gene editing (Figure 4-figure supplement 1A,B). We  
250 next employed a cell competition assay using four distinct populations of engineered T cells  
251 (Figure 4A). These included (1) WT CD19-IL18 T cells; (2) WT GFP T cells; (3) TCR KO T cells  
252 labeled with DsRed; and (4) IL18R KO T cells labeled with AmCyan. Successful deletion of the TCR  
253 and IL18R was confirmed by flowcytometry, and MACS depletion was performed to remove any  
254 residual T cells expressing either TCR or IL18R proteins (Figure 4B). Following *ex vivo* expansion,  
255 all four T cell populations were mixed and flowcytometry analysis confirmed the ratio of (WT  
256 CD19-IL18):(WT GFP):(TCR KO DSRED):(IL18R KO AMCYAN) cells to be 8.59% : 7.45% : 6.71% :  
257 7.27% of total T cells (Figure 4C). The mixed population of T cells was injected into NSG mice and  
258 blood and spleen were collected for analysis when mice exhibited significant loss of bodyweight.  
259 Staining for IL18RA indicated that AmCyan labeled T cells partially regained low levels of IL18R  
260 expression (Figure 4D), and likely represent T cells that did not undergo successful gene editing  
261 and were not completely removed by MACS depletion.

262 Flowcytometry analysis revealed the final ratio of (WT CD19-IL18):(WT GFP):(TCR KO  
263 DSRED):(IL18R KO AMCYAN) to be 22.0% : 18.0% : 5.82% : 0.43% (Figure 4E). The number of  
264 CD45+ human T cells in individual mice ranged from 32800 to 79600 cells/ $\mu$ l blood (Figure 4F),  
265 confirming that all mice exhibited IL18-mediated T cell proliferation. Interestingly, the ratio of  
266 WT CD19-IL18 to WT GFP T cells following *in vivo* expansion was essentially unchanged (Figure  
267 4G), consistent with the data in Figure 1D,E indicating that IL18 could drive equal expansion of  
268 CD19 CAR positive and negative T cells. In contrast, the proportion of IL18R KO AMCYAN T cells  
269 decreased significantly in blood and spleen, and it was even more dramatic for TCR KO DSRED T  
270 cells (Figure 4G). These data indicate that both TCR and IL18 signaling are required for IL18  
271 mediated proliferation of human T cells as tested *in vivo* in the NSG model.

#### 272 **IL18 costimulation with CAR signaling significantly enhanced CART proliferation and antitumor** 273 **activity in xenograft model**

274 As our data indicate that IL18 expression promotes TCR-mediated T cell proliferation, we  
275 hypothesized that IL18 costimulation would also enhance CART cell proliferation and anti-tumor  
276 efficacy. To avoid GVHD, only TCR-deficient (TCR-) T cells were used in these experiments. NSG  
277 mice were engrafted with Nalm6 tumor cells expressing CBG and GFP reporter proteins, and  
278 subsequently treated with either TCR- CD19-IL18 or control TCR- CD19-GFP CART cells. Tumor  
279 burden was assessed by bioluminescent imaging. TCR- CD19-IL18 T cells effectively cleared  
280 detectable tumor cells by day 10 (Figure 5A), in contrast to TCR- CD19-GFP T cells (Figure 5A,B).  
281 In addition, TCR- SS1-IL18 CART cells had no effect on tumor progression (Figure 5B). Although



282 TCR- CD19-IL18 CART cells caused a transient decrease in body weight at D8, body weight  
283 returned to baseline levels and remained stable thereafter (Figure 5C). Remarkably, mice  
284 injected with TCR- CD19-IL18 CART cells remained viable for over 185 days post T cell injection,  
285 except for one mouse that exhibited tumor relapse at day 101 (Figure 5A,D) due to  
286 downregulation of CD19 expression (Figure 5-figure supplement 1A). Emergence of  
287 contaminating TCR+ CD19-IL18 CART cells was not observed at any point during treatment  
288 (Figure 5G).

289 From day 10 through day 21, mice receiving TCR- CD19-IL18 CART cells maintained  
290 approximately 350 CD3-CD45+ T cells/ $\mu$ l blood (Figure 5E), whereas the number of CD19-GFP  
291 CART cells varied between 0.8 and 10.5 CD3-CD45+ T cells/ $\mu$ l. This approximately 100-fold  
292 difference suggests that IL18 significantly enhanced proliferation of CD19 CART cells, resulting in  
293 superior antitumor activity. Consistent with the expansion of CD19 CART cells, IL18  
294 concentrations were high, averaging 77500pg/ml at D10 (Figure 5F). Subsequently, the number  
295 of T cells and IL18 concentrations decreased to below 1 CD3-CD45+ T cell/ $\mu$ l and approximately  
296 100pg/ml in tumor-free mice. Flowcytometric analyses revealed that the distribution of CD4 and  
297 CD8 T cells rapidly evolved from equal balance at D10 (37% vs 55%, respectively) to CD4  
298 domination at D21 (86% vs 11%) (Figure 5H). Interestingly, CD19-IL18 CART cells attained a  
299 primarily EM phenotype in both CD4 and CD8 subsets (Figure 5I). In the single mouse that  
300 developed a recurrent tumor associated with CD19 downregulation (Figure 5-figure supplement  
301 1A), the number of T cells rose back to 373 CD3-CD45+ T cells/ $\mu$ l, and IL18 concentration back to  
302 50209 pg/ml, while the percentage of CD3-CD45+ cells was still 99.6% (Figure 5-figure  
303 supplement 1B). This observation suggested that TCR- CD19-IL18 CART cells were still capable of  
304 expanding in response to tumor relapse, presumably in an antigen-dependent manner, while  
305 retaining a primarily CD4 T<sub>EM</sub> phenotype (Figure 5-figure supplement 1C).

306 These results collectively demonstrate that IL18 can significantly enhance CART cell proliferation  
307 and induce superior anti-tumor activity. Equally important, the use of TCR-deficient CART cells  
308 obviated concerns of developing TCR-mediated GVHD during therapy.

### 309 **Designing an NFAT-based inducible system for IL18 production: APACHE T cells**

310 Our data indicate that including the IL18 expression cassette within the CAR lentiviral design  
311 strongly enhanced T cell proliferation in response to TCR or CAR stimulation, and may be  
312 preferable to expanding CART cells that do not constitutively secrete cytokines. However, the  
313 high concentration of systemic IL18 produced by CART cells could raise potential safety concerns  
314 related to pathological activation or proliferation of bystander T cells reacting against foreign or  
315 self-antigens, or induction of NK cell mediated inflammation. We therefore designed an  
316 inducible system in which IL18 production is only activated after CAR engagement with tumor  
317 antigen. Specifically, we generated a lentiviral vector in which the expression of CD19 CAR, GFP,  
318 and IL18 is under the control of the NFAT promoter (Figure 6A). Once expressed, CD19 CAR will  
319 engage with antigen to stimulate NFAT promoter activity. This, in turn, will maintain CD19 CAR  
320 and IL18 expression through a positive feedback circuit. Once tumor antigen is cleared, CD19

321 CAR and IL18 expression levels should return to baseline, overcoming potential toxic effects of  
322 long-term constitutive IL18 expression. Because the endogenous TCR can also activate NFAT  
323 signaling pathways, we conducted these experiments in T cells rendered deficient in TCR  
324 expression by CRISPR/Cas9. In order to initially activate the signaling cascade, the cells were  
325 engineered to transiently express a CD19 CAR by mRNA electroporation into TCR-deficient T  
326 cells already lentivirally transduced with the NFAT-driven cassette (Ren et al., 2016; Zhao et al.,  
327 2010), as shown in Figure 6A. Deleting the TCR gene in these cells by CRISPR/Cas9 gene editing  
328 avoids unwanted NFAT activation by endogenous TCR signaling (Figure 6A).

329 We tested the inducible NFAT-CD19-GFP-IL18 TCR-deficient T cells expanded as described in the  
330 timeline shown in Figure 6A. TCR-/NFAT-CD19-GFP-IL18 T cells were restimulated under  
331 different conditions, and analyzed for GFP expression and IL18 production. The results showed  
332 that irradiated K562-CD19 aAPC and PMA/ionomycin treatment induced similar levels of GFP  
333 expression and IL18 synthesis in TCR WT and TCR KO NFAT-CD19-GFP-IL18 T cells, whereas anti-  
334 CD3/28 beads only activated GFP expression and IL18 synthesis in TCR WT NFAT-CD19-GFP-IL18  
335 T cells (Figure 6B,C). This observation demonstrated that the inducible system, which we  
336 deemed **Antigen Propelled Activation of Cytokine Helper Ensemble (APACHE)**, operates as  
337 intended. In NSG mice bearing Nalm6 xenograft tumors, APACHE-armored CD19 CART cells  
338 suppressed tumor progression more effectively, and resulted in better survival, than TCR-/NFAT  
339 CD19-GFP CART cells and TCR-/untransduced (UTD) T cells expressing mRNA encoded CD19 CAR  
340 (Figure 6D,E). APACHE-armored CD19 CART cells did not induce significant loss of body weight  
341 and only low levels of systemic IL18 were detected at day 10 and day 15 following T cell  
342 injection (Figure 6E), suggesting that this inducible system could minimize the potential risk of  
343 continuous systemic IL18 expression.

344

## 345 **Discussion**

346 Except for B cell tumors treated with CD19 CAR T cells, a major limitation of current CAR T cell  
347 approaches has been insufficient expansion and persistence of the infused T cells, as  
348 exemplified by trials in ovarian and brain cancer (Brown et al., 2015; Kershaw et al., 2006), and  
349 reviewed in (Fesnak et al., 2016; Gilham et al., 2012; Jensen and Riddell, 2015). IL12, a cytokine  
350 related to IL18, has shown promise in augmenting antitumor effects and T cell expansion  
351 (Chmielewski et al., 2014; Pegram et al., 2012). There may be some advantages to the use of  
352 IL18, including that it is a single chain cytokine in contrast to IL12, which is heterodimeric. In  
353 addition, IL18 has been tested as a single agent in clinical trials and shown to have moderate  
354 antitumor effects and an acceptable safety profile (Robertson et al., 2006). In contrast, IL12 has  
355 been shown to have unacceptable toxicity in previous trials (Cohen, 1995).

356 IL18 can regulate both innate and adaptive immune responses through its effects on natural  
357 killer (NK) cells, monocytes, dendritic cells, T cells, and B cells (Dinarelli et al., 2013). The most  
358 important biologic effect of IL18 is that it acts synergistically with other pro-inflammatory

359 cytokines to promote interferon- $\gamma$  production by NK cells, T cells, and possibly other cell types.  
360 Due to the pleiotropic functions of IL18, tissue-accumulated IL18 has been shown to impact both  
361 the tumor stroma and the immune response, by sustaining T cell cytolytic activity, recruiting and  
362 activating innate immune cells, and re-programming stroma associated immune suppressor cells  
363 (Chmielewski et al., 2014). The rationale for our studies is that the accumulation of IL18 as a  
364 transgenic pro-inflammatory cytokine is intended to recruit a second wave of immune cells to  
365 the tumor microenvironment to mediate antitumor effects towards cancer cells that are  
366 resistant to the direct effects of the CAR T cells.

367 Many studies have shown that efficacy of adoptive cell therapy with tumor targeted T cells is  
368 enhanced by host conditioning using radiation or lymphodepleting chemotherapy. Intensive  
369 chemotherapy or radiation given to enhance adoptive cell therapy has been reported to have  
370 severe toxicity in some patients (Goff et al., 2016). Given the pronounced augmentation of CAR  
371 T cell engraftment that we observed with T cells secreting IL18, it is possible that this may  
372 decrease the need for prior host conditioning. In preclinical models with mouse CAR T cells  
373 engineered to secrete IL-12, the need for lymphodepletion was obviated (Pegram et al., 2012).

374 One concern with CAR T cells armored with IL18 is the potential for systemic inflammation (Car  
375 et al., 1999). To mitigate this possibility several strategies will be employed in clinical trials. First,  
376 CAR-IL18 T cells will be given in low doses where the calculated maximal levels of IL18 could not  
377 reach the levels shown to be safe in humans in previous trials (Robertson et al., 2006). Secondly,  
378 if cytokine levels become a concern, they can be reduced by incorporation of various kill switch  
379 strategies (Straathof et al., 2003). Finally, a more elegant approach was developed here where  
380 the IL18 transgene was not constitutively expressed, but rather, was only induced and secreted  
381 upon encountering with the surrogate tumor antigen. Presumably this would limit IL18 secretion  
382 to the tumor microenvironment, and limit systemic exposure.

383 A limitation of our *in vivo* studies is that they were conducted in an immunodeficient NSG  
384 mouse model. A strength of this model is that it enabled testing of the APACHE CAR T cells in a  
385 robust tumor model. However, the tumor microenvironment is lacking in this model since the  
386 tumor stroma is composed largely of mouse cells. In humans and in mice, the biologic activity of  
387 IL18 is balanced by the presence of a high affinity, naturally occurring IL18 binding protein  
388 (IL18BP). This binding occurs with a high affinity and has been reported to occur interspecies  
389 between mouse and human IL18 (Aizawa et al., 1999). It is possible that the toxicity observed in  
390 the mice manifested by systemic inflammation, weight loss and death in some cases, was  
391 exaggerated or underreported based on the relative balance of mouse IL18BP and the  
392 transgenic IL18 secreted by the APACHE T cells.

393 In summary, we demonstrate that CAR T cells can be engineered to secrete IL18 that supports *in*  
394 *vivo* engraftment and persistence of the CAR T cells. Our observations demonstrate that IL18 has  
395 a previously unappreciated form of costimulation on human CD4<sup>+</sup> T cells, and therefore these  
396 IL18 expressing CD4 T cells can be categorized as synthetic T helper cell producing IL18 (sTH18).  
397 These findings may have therapeutic implications because the CAR IL18 T cells can support the

398 proliferation of CD8 T cells, and because increasing evidence points to the importance of  
399 adoptively transferred CD4+ T cells in antitumor effects (Hunder et al., 2008; Hung et al., 1998).  
400 Finally, CAR T cells with inducible IL18 may have a role in immune-surveillance and have a  
401 therapeutic potential for inducing antigenic spread. Before translation of this technology into  
402 clinical setting, further investigation is underway to address the IL18-CART toxicity and biology in  
403 syngeneic models .

## 404 **Materials and Methods**

### 405 Mice and cell lines

406 NOD-SCID-G chain-/- (NSG) were purchased from Jackson Laboratories, and all animal  
407 procedures were performed in animal facility at the University of Pennsylvania in accordance  
408 with Federal and Institutional Animal Care and Use Committee requirements. Wild-type parental  
409 AsPC1, K562 cells and Nalm-6 cells (purchased from American Type Culture Collection) were  
410 engineered to express CBG-T2A-GFP as a reporter gene and trace of luciferase activity *in vitro*  
411 and *in vivo*. K562 with CBG-T2A-GFP cells were further engineered to express human CD19  
412 (K562-CD19) or human mesothelin (K562-CD19).

413

### 414 Molecular cloning

415 The parental vector pTRPE SS1BBz contains scFV recognizing human mesothelin, 4-1BB and CD3z  
416 intracellular signaling domains. The sequence encoding mature human IL18 (Uniprot Q14116)  
417 were synthesized from IDT and cloned into pTRPE SS1BBz along with a T2A (Kim et al., 2011)  
418 linker (pTRPE SS1BBz-T2A-hIL18). GFP and Humanized CAR CD19BBz were cloned to replace  
419 SS1BBz to generate pTRPE CD19BBz-T2A-hIL18 and pTRPE GFP-T2A-hIL18. GFP was cloned to  
420 replace SS1BBz to generate pTRPE GFP. GFP was also cloned to replace hIL18 to generate pTRPE  
421 SS1BBz-T2A-GFP and pTRPE CD19BBz-T2A-GFP. In order to generate the lentivector construct  
422 pTRPE NFAT CD19-GFP-IL18, the parental vector pTRPE SS1BBz was depleted of the fragment  
423 consisting EF1A promoter and SS1 BBz, and inserted with a reverse sequence of synthesized  
424 fragment consisting of an NFAT promoter (Zhang et al., 2015) followed by GFP with a P2A (Kim  
425 et al., 2011) linker. The resulting pTRPE NFAT GFP vector was modified by replacing GFP with  
426 CD19BBz, which was further modified by inserting a fragment of GFP or GFP-T2A-IL18  
427 downstream of P2A site to generate pTRPE NFAT CD19-GFP or CD19-GFP-IL18.

428

### 429 Primary T cell expansion

430 Primary donor T cells were transduced with lentivector encoding CAR or GFP with or without  
431 hIL18 and expanded as previously reported (Milone et al., 2009). In brief, primary donor T cells  
432 were activated with anti-CD3/CD28 Dynabeads (LifeTechnologies) at D0, and transduced with  
433 lentivector at D1. Fresh medium was added at D3 and the activated T cells were de-beaded at  
434 D5 and maintained at 7e5/ml until rested T cells were frozen in liquid nitrogen.

435

### 436 CRISPR/Cas9 gene knockout

437 Primary donor T cells were transduced with lentivector encoding CAR or GFP with or without  
438 hIL18 and engineered with CRISPR/Cas9 system as previously reported (Cong et al., 2013; Jinek  
439 et al., 2012; Mali et al., 2013; Ren et al., 2016). In brief, primary donor T cells were activated  
440 with anti-CD3/CD28 Dynabeads (LifeTechnologies) at D0, and transduced with lentivector at D1.  
441 The activated T cells were de-beaded at D3 and electroporated with sgRNA and Cas9 RNA at D3

442 and D4. Then the T cells were maintained at  $7 \times 10^5$ /ml until rested T cells were frozen in liquid  
443 nitrogen.  
444  
445 TCR-deficient T cells were achieved with sgRNA targeting GGAGAATGACGAGTGGACCC within  
446 TCRB region. For the IL18R knockout we designed 7 sgRNA targeting IL18RA (Cong et al., 2013;  
447 Jinek et al., 2012; Mali et al., 2013), and utilized RNA electroporation to induce CRISPR/Cas9  
448 mediated gene editing following the procedure of generating TCR KO universal CART (Ren et al.,  
449 2015). The screening of IL18RA KO showed that a the A4 sgRNA produced the most efficient  
450 gene knockout (Figure 4-figure supplement 1A), and sequencing of the PCR product spanning  
451 the gene edited site confirmed mutations in the DNA sequence (GTACAAAAGCAGTGGATCAC)  
452 targeted by the A4 sgRNA (Figure 4-figure supplement 1B).

453

## 454 **Contributions**

455 CHJ and BH proposed the concept of IL18 expressing CART for cancer immunotherapy. BH  
456 designed all, and performed most, of the experiments. JR, BH, and YZ executed the knockout of  
457 TCR and IL18R by CRISPR/Cas9. BH and YL conducted live animal imaging, Trucount analyses and  
458 mouse necropsy. JS provided scientific resources, such as parental cloning vectors and research  
459 animals. BH, CHJ, BK and RMY wrote and edited the manuscript.

## 460 **Acknowledgements**

461 This work was supported by a US National Institutes of Health (NIH) grant to C.H.J and Y.Z  
462 (2R01CA120409), by a sponsored research grant from Novartis, and National Institutes of Health  
463 National Cancer Institute grants T32 CA009140 (B.H.). This arrangement is managed in  
464 accordance with the University of Pennsylvania's Conflict of Interest Policy. The authors are in  
465 compliance with this policy.

466 Throughout the study, we really appreciate excellent scientific coordination by Regina Young,  
467 and passionate discussion and great help from Chien-Ting Lin and Avery Posey in the June lab.  
468 We also appreciate all the help from other members in the June Lab, including Decheng Song,  
469 Joseph Fraietta, Shannon McGettigan, Sonia Guedan, Kathleen Haines, Tong Da, Keisuke  
470 Watanabe, Mauro Castellarin, Christopher Kloss and Michael Klichinsky. We are really grateful  
471 to the analysis of whole mouse pathology by Elizabeth Buza and her team from Comparative  
472 Pathology Core at UPENN, and the luminex analysis by Patricia Tsao and Yinan Lu from Human  
473 Immunology Core at UPENN, and the IHC staining by Daniel Martinez from Pathology Core  
474 Laboratory of Children's Hospital of Philadelphia Research Institute.

475 B.H., C.H.J. and Y.Z. have financial interests due to a pending patent application. Conflicts of  
476 interest are managed in accordance with University of Pennsylvania policy and oversight. The  
477 other authors declare that they have no competing interests.

478

479 **References**

- 480 Aizawa, Y., Akita, K., Taniyai, M., Torigoe, K., Mori, T., Nishida, Y., Ushio, S., Nukada, Y., Tanimoto,  
481 T., and Ikegami, H. (1999). Cloning and expression of interleukin-18 binding protein. *FEBS letters*  
482 *445*, 338-342.
- 483 Bevan, M.J. (2004). Helping the CD8(+) T-cell response. *Nat Rev Immunol* *4*, 595-602.
- 484 Boyman, O., and Sprent, J. (2012). The role of interleukin-2 during homeostasis and activation of  
485 the immune system. *Nat Rev Immunol* *12*, 180-190.
- 486 Brown, C.E., Badie, B., Barish, M.E., Weng, L., Ostberg, J.R., Chang, W.-C., Naranjo, A., Starr, R.,  
487 Wagner, J., Wright, C., *et al.* (2015). Bioactivity and Safety of IL13R $\alpha$ 2-Redirected Chimeric  
488 Antigen Receptor CD8+ T cells in Patients with Recurrent Glioblastoma. *Clinical Cancer Research*.
- 489 Car, B.D., Eng, V.M., Lipman, J.M., and Anderson, T.D. (1999). The toxicology of interleukin-12: a  
490 review. *Toxicol Pathol* *27*, 58-63.
- 491 Carroll, R.G., Carpenito, C., Shan, X., Danet-Desnoyers, G., Liu, R., Jiang, S., Albelda, S.M.,  
492 Golovina, T., Coukos, G., Riley, J.L., *et al.* (2008). Distinct effects of IL-18 on the engraftment and  
493 function of human effector CD8 T cells and regulatory T cells. *PLoS One* *3*, e3289.
- 494 Carson, W.E., Dierksheide, J.E., Jabbour, S., Anghelina, M., Bouchard, P., Ku, G., Yu, H., Baumann,  
495 H., Shah, M.H., Cooper, M.A., *et al.* (2000). Coadministration of interleukin-18 and interleukin-12  
496 induces a fatal inflammatory response in mice: critical role of natural killer cell interferon-  
497 gamma production and STAT-mediated signal transduction. *Blood* *96*, 1465-1473.
- 498 Cha, E., Graham, L., Manjili, M.H., and Bear, H.D. (2010). IL-7 + IL-15 are superior to IL-2 for the  
499 ex vivo expansion of 4T1 mammary carcinoma-specific T cells with greater efficacy against  
500 tumors in vivo. *Breast Cancer Res Treat* *122*, 359-369.
- 501 Chapuis, A.G., Ragnarsson, G.B., Nguyen, H.N., Chaney, C.N., Pufnock, J.S., Schmitt, T.M.,  
502 Duerkopp, N., Roberts, I.M., Pogosov, G.L., Ho, W.Y., *et al.* (2013). Transferred WT1-reactive  
503 CD8+ T cells can mediate antileukemic activity and persist in post-transplant patients. *Sci Transl*  
504 *Med* *5*, 174ra127.
- 505 Chen, L., and Flies, D.B. (2013). Molecular mechanisms of T cell co-stimulation and co-inhibition.  
506 *Nature Reviews Immunology* *13*, 227-242.
- 507 Chinnasamy, D., Yu, Z., Kerkar, S.P., Zhang, L., Morgan, R.A., Restifo, N.P., and Rosenberg, S.A.  
508 (2012). Local delivery of interleukin-12 using T cells targeting VEGF receptor-2 eradicates  
509 multiple vascularized tumors in mice. *Clin Cancer Res* *18*, 1672-1683.
- 510 Chmielewski, M., Hombach, A.A., and Abken, H. (2014). Of CARs and TRUCKs: chimeric antigen  
511 receptor (CAR) T cells engineered with an inducible cytokine to modulate the tumor stroma.  
512 *Immunol Rev* *257*, 83-90.
- 513 Chmielewski, M., Kopecky, C., Hombach, A.A., and Abken, H. (2011). IL-12 release by engineered  
514 T cells expressing chimeric antigen receptors can effectively Muster an antigen-independent

- 515 macrophage response on tumor cells that have shut down tumor antigen expression. *Cancer Res*  
516 *71*, 5697-5706.
- 517 Cieri, N., Camisa, B., Cocchiarella, F., Forcato, M., Oliveira, G., Provasi, E., Bondanza, A.,  
518 Bordignon, C., Peccatori, J., Ciceri, F., *et al.* (2013). IL-7 and IL-15 instruct the generation of  
519 human memory stem T cells from naive precursors. *Blood* *121*, 573-584.
- 520 Cohen, J. (1995). IL-12 deaths: explanation and a puzzle. *Science* *270*, 908.
- 521 Cong, L., Ran, F.A., Cox, D., Lin, S., Barretto, R., Habib, N., Hsu, P.D., Wu, X., Jiang, W., Marraffini,  
522 L.A., *et al.* (2013). Multiplex genome engineering using CRISPR/Cas systems. *Science* *339*, 819-  
523 823.
- 524 Curtsinger, J.M., and Mescher, M.F. (2010). Inflammatory cytokines as a third signal for T cell  
525 activation. *Current opinion in immunology* *22*, 333-340.
- 526 Dinarello, C., Novick, D., Kim, S., and Kaplanski, G. (2013). Interleukin-18 and IL-18 binding  
527 protein. *Frontiers in immunology* *4*, 289.
- 528 Dotti, G., Gottschalk, S., Savoldo, B., and Brenner, M.K. (2014). Design and development of  
529 therapies using chimeric antigen receptor - expressing T cells. *Immunological reviews* *257*, 107-  
530 126.
- 531 Dranoff, G. (2004). Cytokines in cancer pathogenesis and cancer therapy. *Nat Rev Cancer* *4*, 11-  
532 22.
- 533 Fesnak, A.D., June, C.H., and Levine, B.L. (2016). Engineered T cells: the promise and challenges  
534 of cancer immunotherapy. *Nature reviews Cancer* *16*, 566-581.
- 535 Frigault, M.J., Lee, J., Basil, M.C., Carpenito, C., Motohashi, S., Scholler, J., Kawalekar, O.U.,  
536 Guedan, S., McGettigan, S.E., Posey, A.D., Jr., *et al.* (2015). Identification of chimeric antigen  
537 receptors that mediate constitutive or inducible proliferation of T cells. *Cancer Immunol Res* *3*,  
538 356-367.
- 539 Gilham, D.E., Debets, R., Pule, M., Hawkins, R.E., and Abken, H. (2012). CAR-T cells and solid  
540 tumors: tuning T cells to challenge an inveterate foe. *Trends Mol Med* *18*, 377-384.
- 541 Goff, S.L., Dudley, M.E., Citrin, D.E., Somerville, R.P., Wunderlich, J.R., Danforth, D.N., Zlott, D.A.,  
542 Yang, J.C., Sherry, R.M., Kammula, U.S., *et al.* (2016). Randomized, Prospective Evaluation  
543 Comparing Intensity of Lymphodepletion Before Adoptive Transfer of Tumor-Infiltrating  
544 Lymphocytes for Patients With Metastatic Melanoma. *J Clin Oncol* *34*, 2389-2397.
- 545 Harris, D.T., and Kranz, D.M. (2016). Adoptive T Cell Therapies: A Comparison of T Cell Receptors  
546 and Chimeric Antigen Receptors. *Trends Pharmacol Sci* *37*, 220-230.
- 547 Hinrichs, C.S., and Rosenberg, S.A. (2014). Exploiting the curative potential of adoptive T-cell  
548 therapy for cancer. *Immunol Rev* *257*, 56-71.

- 549 Hsu, C., Jones, S.A., Cohen, C.J., Zheng, Z., Kerstann, K., Zhou, J., Robbins, P.F., Peng, P.D., Shen,  
550 X., Gomes, T.J., *et al.* (2007). Cytokine-independent growth and clonal expansion of a primary  
551 human CD8+ T-cell clone following retroviral transduction with the IL-15 gene. *Blood* 109, 5168-  
552 5177.
- 553 Hunder, N., Wallen, H., Cao, J., Hendricks, D., Reilly, J., Rodmyre, R., Jungbluth, A., Gnjatich, S.,  
554 Thompson, J., and Yee, C. (2008). Treatment of metastatic melanoma with autologous CD4+ T  
555 cells against NY-ESO-1. *The New England journal of medicine* 358, 2698.
- 556 Hung, K., Hayashi, R., Lafond-Walker, A., Lowenstein, C., Pardoll, D., and Levitsky, H. (1998). The  
557 central role of CD4(+) T cells in the antitumor immune response. *J ExpMed* 188, 2357-2368.
- 558 Hurton, L.V., Singh, H., Najjar, A.M., Switzer, K.C., Mi, T., Maiti, S., Olivares, S., Rabinovich, B.,  
559 Huls, H., Forget, M.A., *et al.* (2016). Tethered IL-15 augments antitumor activity and promotes a  
560 stem-cell memory subset in tumor-specific T cells. *Proc Natl Acad Sci U S A*.
- 561 Jensen, M.C., and Riddell, S.R. (2014). Design and implementation of adoptive therapy with  
562 chimeric antigen receptor-modified T cells. *Immunol Rev* 257, 127-144.
- 563 Jensen, M.C., and Riddell, S.R. (2015). Designing chimeric antigen receptors to effectively and  
564 safely target tumors. *Curr Opin Immunol* 33c, 9-15.
- 565 Jinek, M., Chylinski, K., Fonfara, I., Hauer, M., Doudna, J.A., and Charpentier, E. (2012). A  
566 programmable dual-RNA-guided DNA endonuclease in adaptive bacterial immunity. *Science* 337,  
567 816-821.
- 568 Kalos, M., and June, C.H. (2013). Adoptive T cell transfer for cancer immunotherapy in the era of  
569 synthetic biology. *Immunity* 39, 49-60.
- 570 Kershaw, M.H., Westwood, J.A., Parker, L.L., Wang, G., Eshhar, Z., Mavroukakis, S.A., White, D.E.,  
571 Wunderlich, J.R., Canevari, S., Rogers-Freezer, L., *et al.* (2006). A phase I study on adoptive  
572 immunotherapy using gene-modified T cells for ovarian cancer. *Clin Cancer Res* 12, 6106-6115.
- 573 Kim, J.H., Lee, S.R., Li, L.H., Park, H.J., Park, J.H., Lee, K.Y., Kim, M.K., Shin, B.A., and Choi, S.Y.  
574 (2011). High cleavage efficiency of a 2A peptide derived from porcine teschovirus-1 in human  
575 cell lines, zebrafish and mice. *PLoS One* 6, e18556.
- 576 Kochenderfer, J., Wilson, W., Janik, J., Dudley, M., Stetler-Stevenson, M., Feldman, S., Maric, I.,  
577 Raffeld, M., Nathan, D., Lanier, B., *et al.* (2010). Eradication of B-lineage cells and regression of  
578 lymphoma in a patient treated with autologous T cells genetically-engineered to recognize CD19.  
579 *Blood* 116, 4099-4102.
- 580 Koneru, M., Purdon, T.J., Spriggs, D., Koneru, S., and Brentjens, R.J. (2015). IL-12 secreting  
581 tumor-targeted chimeric antigen receptor T cells eradicate ovarian tumors in vivo.  
582 *Oncoimmunology* 4, e994446.
- 583 Lee, S., and Margolin, K. (2011). Cytokines in cancer immunotherapy. *Cancers (Basel)* 3, 3856-  
584 3893.



- 585 Lu, Y.C., Yao, X., Crystal, J.S., Li, Y.F., El-Gamil, M., Gross, C., Davis, L., Dudley, M.E., Yang, J.C.,  
586 Samuels, Y., *et al.* (2014). Efficient identification of mutated cancer antigens recognized by T  
587 cells associated with durable tumor regressions. *Clin Cancer Res* 20, 3401-3410.
- 588 Mali, P., Yang, L., Esvelt, K.M., Aach, J., Guell, M., DiCarlo, J.E., Norville, J.E., and Church, G.M.  
589 (2013). RNA-guided human genome engineering via Cas9. *Science* 339, 823-826.
- 590 Milone, M.C., Fish, J.D., Carpenito, C., Carroll, R.G., Binder, G.K., Teachey, D., Samanta, M.,  
591 Lakhal, M., Gloss, B., Danet-Desnoyers, G., *et al.* (2009). Chimeric receptors containing CD137  
592 signal transduction domains mediate enhanced survival of T cells and increased antileukemic  
593 efficacy in vivo. *Mol Ther* 17, 1453-1464.
- 594 Nakamura, K., Okamura, H., Nagata, K., Komatsu, T., and Tamura, T. (1993). Purification of a  
595 factor which provides a costimulatory signal for gamma interferon production. *Infect Immun* 61,  
596 64-70.
- 597 Nakamura, K., Okamura, H., Wada, M., Nagata, K., and Tamura, T. (1989). Endotoxin-induced  
598 serum factor that stimulates gamma interferon production. *Infect Immun* 57, 590-595.
- 599 Nakanishi, K., Yoshimoto, T., Tsutsui, H., and Okamura, H. (2001). Interleukin-18 regulates both  
600 Th1 and Th2 responses. *Annu Rev Immunol* 19, 423-474.
- 601 Osaki, T., Peron, J.M., Cai, Q., Okamura, H., Robbins, P.D., Kurimoto, M., Lotze, M.T., and Tahara,  
602 H. (1998). IFN-gamma-inducing factor/IL-18 administration mediates IFN-gamma- and IL-12-  
603 independent antitumor effects. *J Immunol* 160, 1742-1749.
- 604 Pegram, H.J., Lee, J.C., Hayman, E.G., Imperato, G.H., Tedder, T.F., Sadelain, M., and Brentjens,  
605 R.J. (2012). Tumor-targeted T cells modified to secrete IL-12 eradicate systemic tumors without  
606 need for prior conditioning. *Blood* 119, 4133-4141.
- 607 Porter, D.L., Levine, B.L., Kalos, M., Bagg, A., and June, C.H. (2011). Chimeric antigen receptor-  
608 modified T cells in chronic lymphoid leukemia. *N Engl J Med* 365, 725-733.
- 609 Ren, J., Liu, X., Fang, C., Jiang, S., June, C.H., and Zhao, Y. (2015). Multiplex Cripsr/Cas9 Genome  
610 Editing to Generate Potent Universal CART and PD1-Deficient Cells Against Leukemia. *Blood*  
611 126:4280.
- 612 Ren, J., Liu, X., Fang, C., Jiang, S., June, C.H., and Zhao, Y. (2016). Multiplex genome editing to  
613 generate universal CAR T cells resistant to PD1 inhibition. *Clin Cancer Res*.
- 614 Robbins, P.F., Lu, Y.C., El-Gamil, M., Li, Y.F., Gross, C., Gartner, J., Lin, J.C., Teer, J.K., Cliften, P.,  
615 Tycksen, E., *et al.* (2013). Mining exomic sequencing data to identify mutated antigens  
616 recognized by adoptively transferred tumor-reactive T cells. *Nat Med* 19, 747-752.
- 617 Robertson, M.J., Mier, J.W., Logan, T., Atkins, M., Koon, H., Koch, K.M., Kathman, S., Pandite,  
618 L.N., Oei, C., Kirby, L.C., *et al.* (2006). Clinical and biological effects of recombinant human  
619 interleukin-18 administered by intravenous infusion to patients with advanced cancer. *Clin*  
620 *Cancer Res* 12, 4265-4273.

- 621 Sato, N., Sabzevari, H., Fu, S., Ju, W., Petrus, M.N., Bamford, R.N., Waldmann, T.A., and Tagaya, Y.  
622 (2011). Development of an IL-15-autocrine CD8 T-cell leukemia in IL-15-transgenic mice requires  
623 the cis expression of IL-15Ralpha. *Blood* *117*, 4032-4040.
- 624 Straathof, K.C., Spencer, D.M., Sutton, R.E., and Rooney, C.M. (2003). Suicide genes as safety  
625 switches in T lymphocytes. *Cytotherapy* *5*, 227-230.
- 626 Yang, X., Zhang, X., Fu, M.L., Weichselbaum, R.R., Gajewski, T.F., Guo, Y., and Fu, Y.X. (2014).  
627 Targeting the tumor microenvironment with interferon-beta bridges innate and adaptive  
628 immune responses. *Cancer Cell* *25*, 37-48.
- 629 Zhang, L., Morgan, R.A., Beane, J.D., Zheng, Z., Dudley, M.E., Kassim, S.H., Nahvi, A.V., Ngo, L.T.,  
630 Sherry, R.M., Phan, G.Q., *et al.* (2015). Tumor-infiltrating lymphocytes genetically engineered  
631 with an inducible gene encoding interleukin-12 for the immunotherapy of metastatic melanoma.  
632 *Clin Cancer Res* *21*, 2278-2288.
- 633 Zhao, Y., Moon, E., Carpenito, C., Paulos, C.M., Liu, X., Brennan, A., Chew, A., Carroll, R.G.,  
634 Scholler, J., Levine, B.L., *et al.* (2010). Multiple injections of electroporated autologous T cells  
635 expressing a chimeric antigen receptor mediate regression of human disseminated tumor.  
636 *Cancer Res* *70*, 9062-9072.
- 637 Zhao, Z., Condomines, M., van der Stegen, S.J., Perna, F., Kloss, C.C., Gunset, G., Plotkin, J., and  
638 Sadelain, M. (2015). Structural Design of Engineered Costimulation Determines Tumor Rejection  
639 Kinetics and Persistence of CAR T Cells. *Cancer Cell* *28*, 415-428.  
640  
641  
642  
643  
644  
645  
646  
647  
648

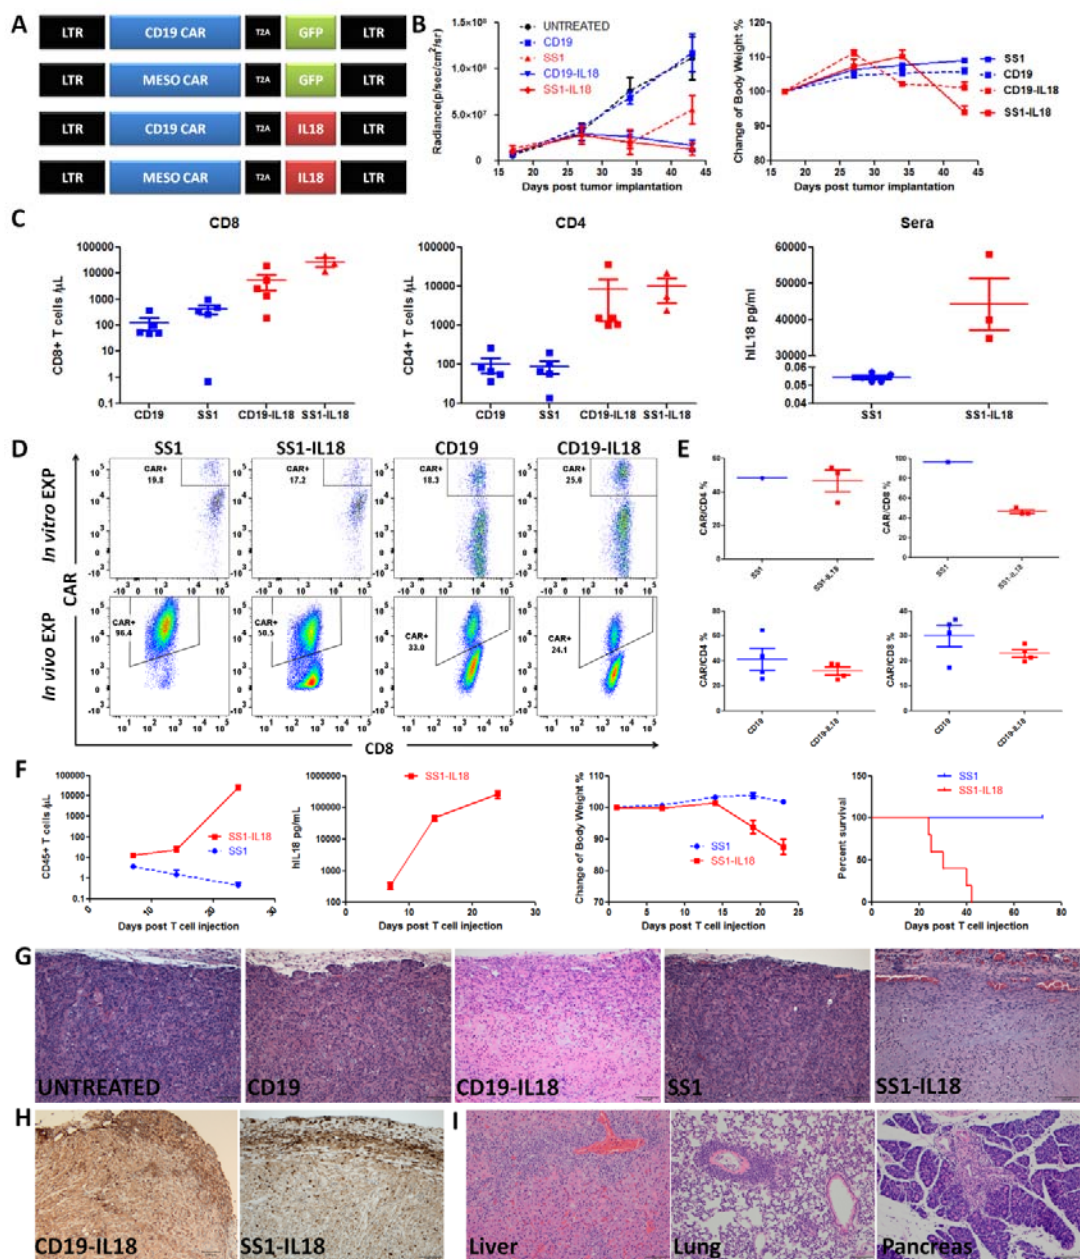

649

650

651

652

653

654

655

656 **Figure 1. IL18 dependent T cell proliferation *in vivo*, and associated GVHD in NSG mice. (A)** The  
657 construction designs of CART are listed as CD19-GFP, SS1-GFP, CD19-IL18, and SS1-IL18. **(B,C)**  
658 NSG mice (n=5) were inoculated with 2.5e6 AsPC1 expressing CBG-T2A-GFP. 3 weeks later, the  
659 mice received 2e6 of different CART as indicated. **(B)** Tumor growth and body weight. **(C)** CD8+  
660 and CD4+ T cells in peripheral blood. IL18 levels were assessed by ELISA. **(D)** Representative  
661 FACS plots showing percentages of CAR+/CD8+ in CART cells during expansion *in vitro* and in the  
662 spleens of mice. Each data point represents cells from a single spleen, except that 5 spleens  
663 from mice receiving SS1 CART were pooled. **(E)** The percentage of CAR+/CD4+ or CAR+/CD8+ T  
664 cells in spleens from (D). **(F)** Tumor free NSG mice (n=5) were inoculated with 5e6 SS1 or SS1-  
665 IL18 CART cells, and monitored for circulating T cells, serum IL18 concentrations, body weight  
666 and survival. **(G)** H&E staining of tumors treated with different CART cells as indicated. **(H)** IHC  
667 staining for human CD3+ T cells in tumor sections from mice treated with CD19-IL18 or SS1-IL18  
668 CART cells. **(I)** Representative pictures of liver, lung and pancreas from mice receiving SS1-IL18  
669 CART cells demonstrated T cell infiltration and GVHD (see also Table S1). All data with error bars  
670 are presented as mean±SEM.

671 The following figure supplements are available for figure 1:

672 **Figure supplement 1.** SS1-IL18 CART cells displayed enhanced cytotoxicity.

673 **Figure supplement 2.** IL18 expanded T cells are polyclonal through phenotyping of TCRB variants.

674 **Figure supplement 3.** CD19-IL18 CART cells mediate dramatic T cell expansion and lethal GVHD  
675 in xenograft model.

676

677

678

679

680

681

682

683

684

685

686

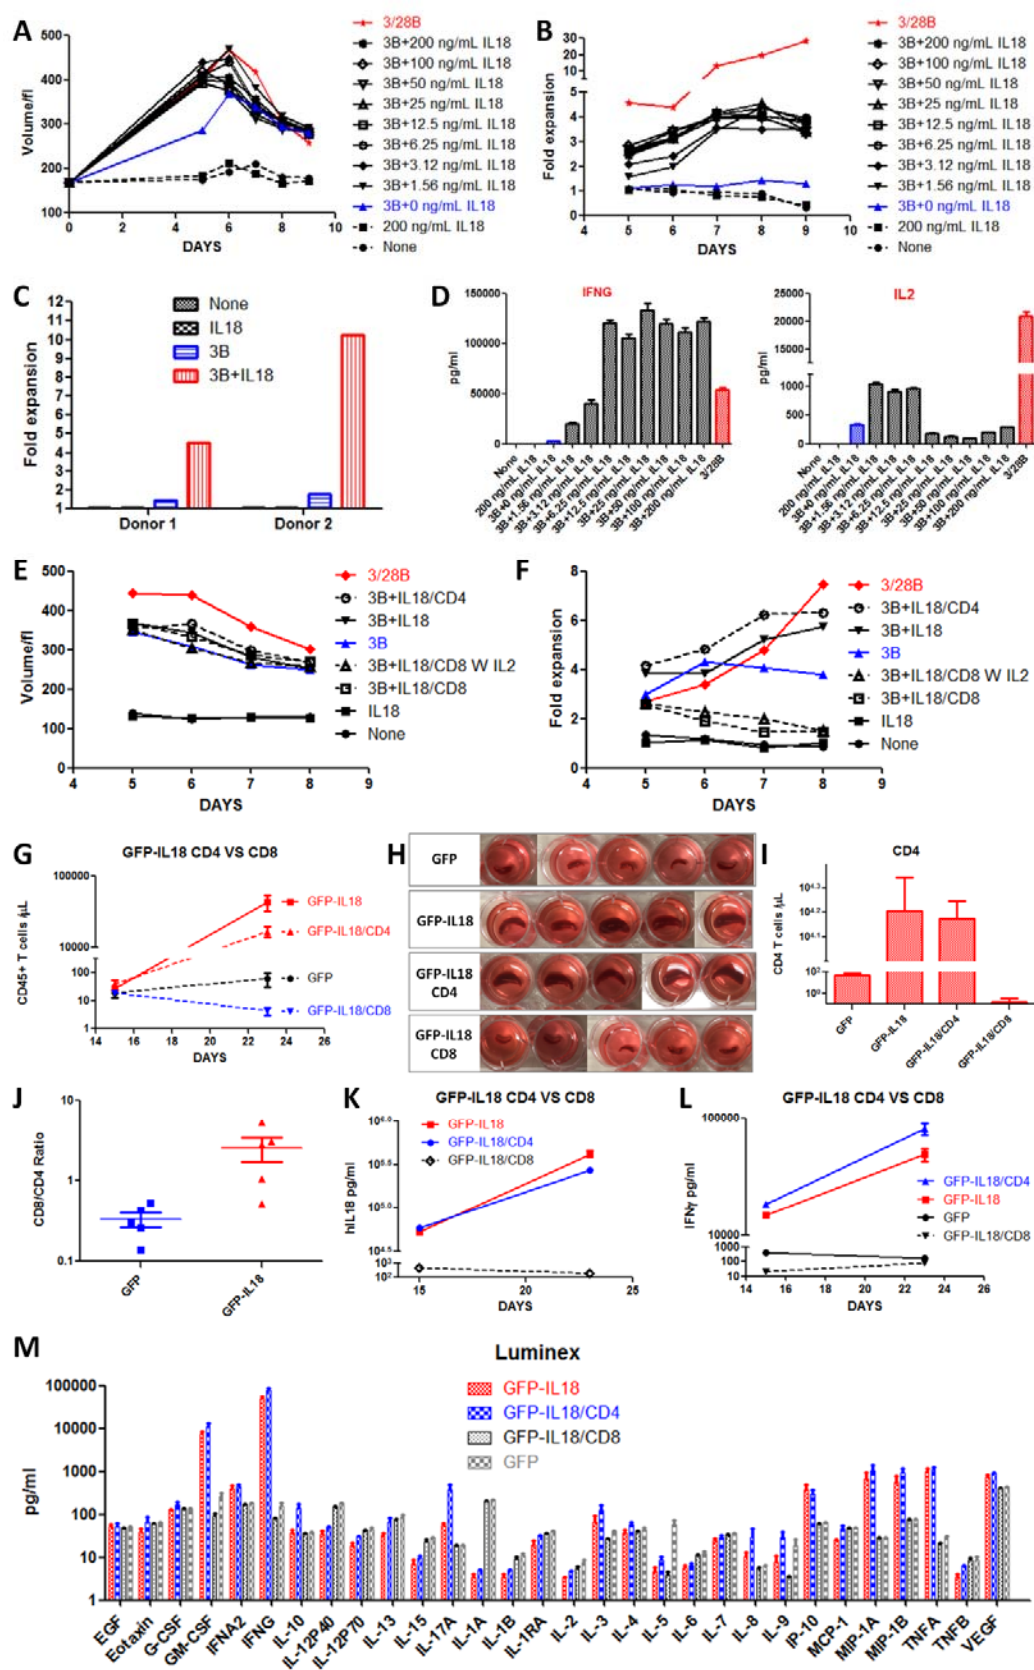

688 **Figure 2. Combined TCR and IL18 signaling promotes CD4 helper dependent T cell expansion.**  
689 **(A-D)** Primary T cells from normal donors were activated with anti-CD3 beads and varying  
690 concentrations (1.56 doubled up to 200 ng/ml) of recombinant IL18 (added at D0 and D3).  
691 Activated T cells were de-beaded at D5 and counted every day afterwards. **(A)** changes in T cell  
692 size and **(B)** proliferation kinetics. **(C)** IL18 dependent expansion of T cells from two different  
693 donors. **(D)** Luminex analysis of secreted IFNG and IL2. Additional cytokine data are shown in  
694 Figure 2-figure supplement 1. **(E,F)** Normal donor T cells expanded with anti-CD3/CD28 beads  
695 were selected by MACS columns to purify CD8 and CD4 T cells. Purified CD8, CD4 T cells, or bulk  
696 CD8+CD4 T cells were restimulated with anti-CD3 beads and 100ng/ml IL18 (added at D0 and  
697 D3). Cell size **(E)** and proliferation kinetics **(F)** were monitored after stimulation with anti-CD3  
698 beads and recombinant IL18. **(G-M)** T cells were transduced with lentivector encoding GFP or  
699 GFP-IL18 at D1 during standard T cells expansion and GFP-IL18/CD8 and GFP-IL18/CD4 T cells  
700 were selected using MACS columns. NSG mice (n=5) were injected intravenously with  $2 \times 10^6$   
701 GFP-IL18 T cells, GFP-IL18/CD8, or GFP-IL18/CD4 T cells. GFP T cells were included as a negative  
702 control. The data shown is representative of two independent experiments. **(G)** Circulating  
703 CD45+ T cells at d15 and D23 after T cells injection. **(H)** Splens from various groups, indicating  
704 splenomegaly in mice receiving GFP-IL18/CD4 or bulk T cells. **(I)** Circulating CD4+CD45+ T cells at  
705 D23 following T cell injection. **(J)** The ratio of CD8 to CD4 T cells. Circulating Serum levels of IL18  
706 **(K)** and IFNG **(L)** at D15 and D23. **(M)** Serum at D23 was analyzed by luminex (duplicate) to  
707 assess cytokine profile.

708 The following figure supplements are available for figure 2:

709 **Figure supplement 1.** Cytokine profile of IL18 and anti-CD3 beads activated T cells.

710 **Figure supplement 2.** Memory phenotype of T cells treated with recombinant IL18 and anti-CD3  
711 beads.

712 **Figure supplement 3.** Memory phenotype of anti-CD3/IL18 restimulated T cells and aAPC  
713 restimulated IL18-CART cells.

714

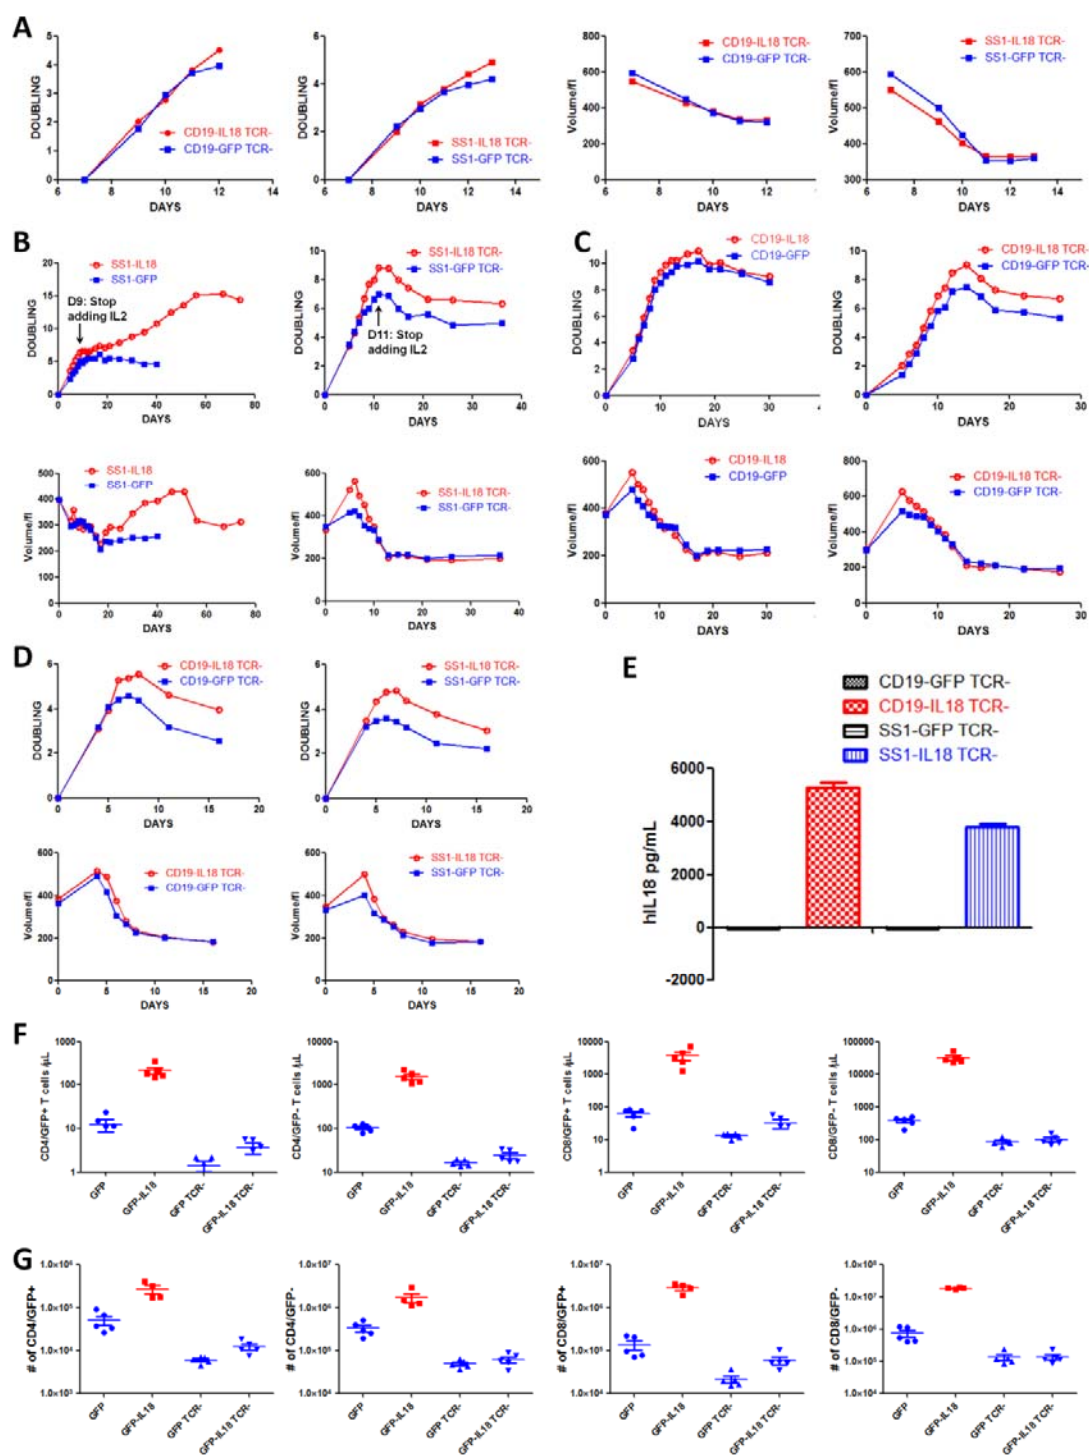

715

716

717

718

719 **Figure 3. IL18 mediated T cell proliferation requires CAR or TCR signaling. (A)** Expansion  
720 kinetics and size of TCR-deficient (TCR-) CD19-GFP or CD19-IL18 CART cells following stimulation  
721 with anti-CD3/CD28 beads and RNA electroporation. **(B)** Expansion kinetics and size of TCR+ and  
722 TCR-deficient SS1-GFP or SS1-IL18 CART cells following restimulation with irradiated mesothelin-  
723 expressing K562 cells in the presence of exogenous IL2 (until day 9 or day 11, as indicated). **(C)**  
724 Expansion kinetics and size of TCR+ and TCR-deficient CD19-GFP or CD19-IL18 CART cells  
725 following restimulation with irradiated CD19-expressing K562 cells in the presence of exogenous  
726 IL2. **(D)** TCR-deficient CART cells expanded from (B) and (C) were further restimulated with aAPC  
727 in the absence of exogenous IL2. **(E)** IL18 secretion (duplicate) of indicated CART cells following  
728 restimulation with cognate antigen. **(F,G)** NSG mice (n=5) were injected with  $2 \times 10^6$  TCR+ or TCR-  
729 deficient T cells expressing either GFP or GFP-IL18. After 18 days, the number of GFP+ and GFP-  
730 CD4+ and CD8+ cells in blood **(F)** or spleens **(G)** was assessed. All data with error bars are  
731 presented as mean $\pm$ SEM.

732 The following figure supplements are available for figure 3:

733 **Figure supplement 1.** Characterization of SS1-IL18 CART cells during extended proliferation.

734 **Figure supplement 2.** Cytokine production by IL18-CART cells stimulated with aAPC.

735 **Figure supplement 3.** IL18RA expression and memory phenotype of IL18 expanded T cells in  
736 xenograft model.

737

738



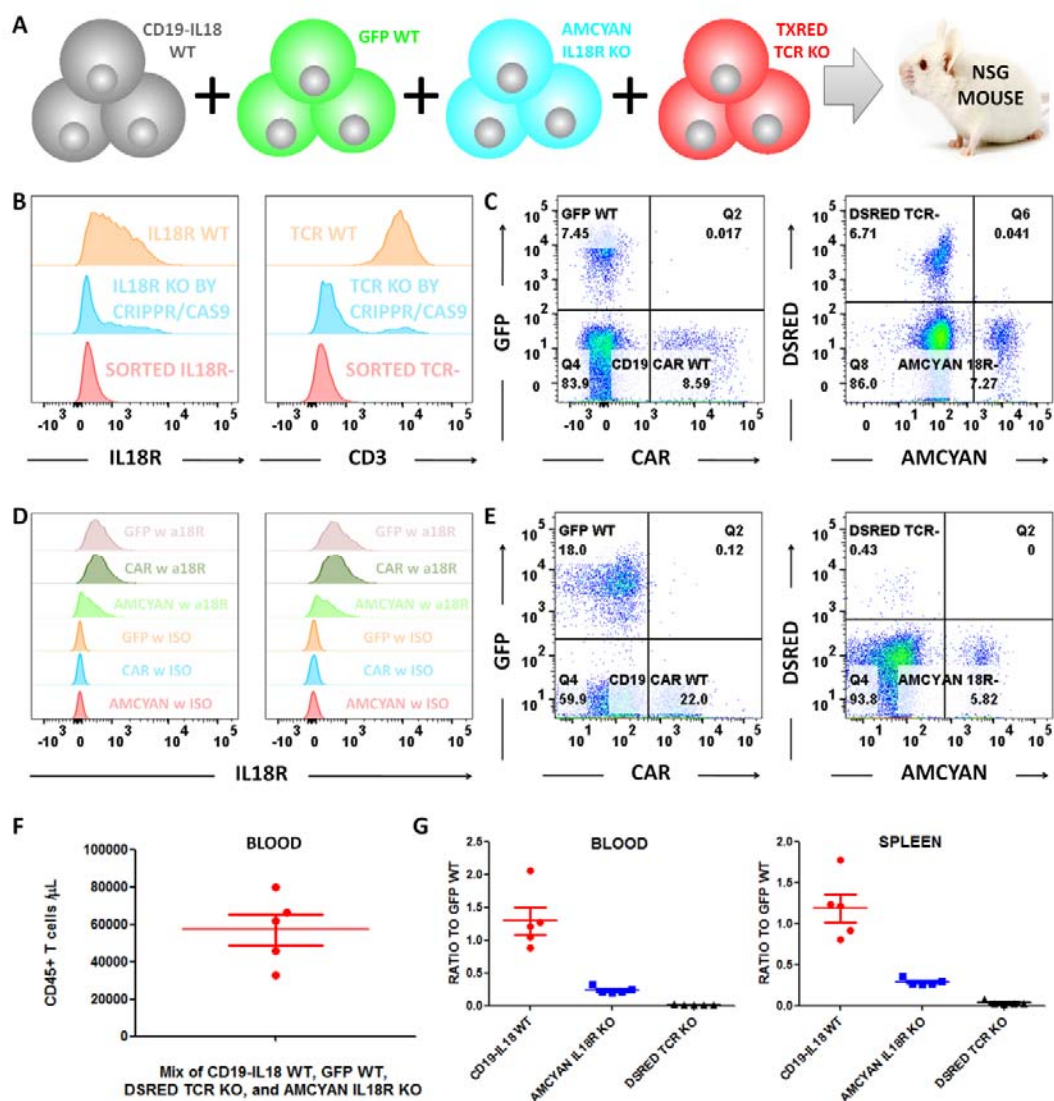

739

740

741

742

743

744

745

746

747

748

749 **Figure4. IL18 receptor is required for cell-autonomous IL18-mediated T cell expansion *in vivo*.**  
750 **(A)** Cell competition assay design. CD19-IL18 WT, GFP WT, Amcyan IL18R KO, and DsRed TCR KO  
751 T cells were mixed together and injected into NSG mouse (n=5) intravenously, to evaluate the  
752 expansion of each cell population in response to IL18 secretion. **(B)** Normal human primary T  
753 cells were activated and transduced with lentiviral expression vectors by standard protocols,  
754 then electroporated with sgRNA targeting TCRB or IL18RA, and Cas9 RNA as described in  
755 Methods. Three days after electroporation, T cells were stained with anti-CD3 or anti-IL18RA to  
756 confirm gene knockout. T cells with TCR or IL18R knockout were stained with anti-CD3, or anti-  
757 IL18RA microbeads and negatively sorted by MACS. **(C)**  $1 \times 10^6$  CD19-IL18 CART cells,  $1 \times 10^6$  GFP T  
758 cells,  $1 \times 10^6$  IL18R deficient Amcyan T cells, and  $1 \times 10^6$  TCR-deficient DsRed T cells were mixed  
759 together and injected intravenously into NSG mice. **(D)** Expression levels of IL18RA on GFP WT,  
760 CD19 CAR WT, and Amcyan IL18R- cells in blood (left) and spleen (right). **(E)** Frequencies of  
761 CD19-IL18 WT, GFP WT, IL18R-deficient Amcyan, and TCR-deficient DsRed T cells in blood. **(F)**  
762 Total circulating CD45+ cells, indicating robust expansion. **(G)** The ratios of CD19 CART WT,  
763 IL18R-deficient Amcyan, and TCR-deficient DsRed to GFP T cells in blood and spleen. All data  
764 with error bars are presented as mean $\pm$ SEM.

765 The following figure supplements are available for figure 4:

766 **Figure supplement 1.** CRISPR/Cas9 targeted knockout of IL18RA expression.

767

768

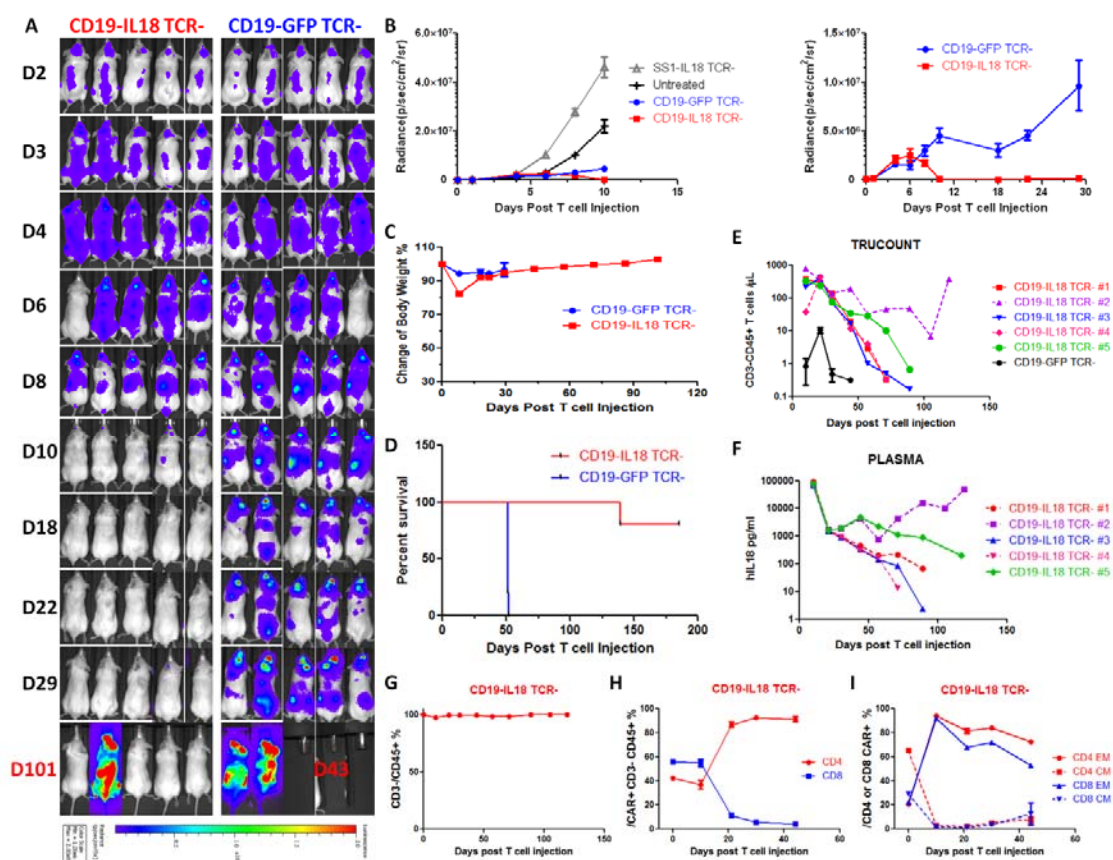

769

770 **Figure 5. IL18 costimulation significantly enhanced proliferation and antitumor activity**  
771 **of CD19 CART cells.** NSG mice were injected intravenously with  $1 \times 10^6$  Nalm6 cells expressing  
772 CBG and GFP reporter proteins. At D7 post tumor injection, mice ( $n=5$ ) were imaged and  
773 randomized into groups to receive  $1 \times 10^6$  TCR-deficient CD19-GFP T cells or CD19-IL18 CART cells.  
774 Mice receiving no CART cells or TCR-deficient SS1-IL18 CART cells were included as controls. The  
775 data shown is representative of two independent experiments. **(A)** Live animal imaging of CBG  
776 expressing tumors in mice receiving CD19-GFP or CD19-IL18 TCR-deficient CART cells. **(B)** Left  
777 panel: tumor growth curves for mice injected with CD19-GFP CART cells, SS1-IL18 CART cells, or  
778 CD19-IL18 CART cells (all TCR-deficient). Untreated control received no T cells. Right panel:  
779 tumor growth in mice receiving TCR-deficient CD19-GFP CART cells or TCR-deficient CD19-IL18  
780 CART cells. Mice were monitored for body weight **(C)** and survival **(D)**. The number of CD3-  
781 CD45+ T cells **(E)** and IL18 concentration **(F)** in blood were monitored over time. **(G)** The  
782 percentage of CD3- cells among total CD45+ cells, distribution of CD4+ and CD8+ T cells within  
783 CD19 CART cells **(H)**, and memory phenotype in CD4+ and CD8+ CART cells **(I)** in mice receiving  
784 TCR-deficient CD19-IL18 CART cells. All data with error bars are presented as mean  $\pm$  SEM.

785 The following figure supplements are available for figure 5:

786 **Figure supplement 1.** Characterization of relapsing Nalm6 cells and re-expanded CD19-IL18 TCR-  
787 CART cells.

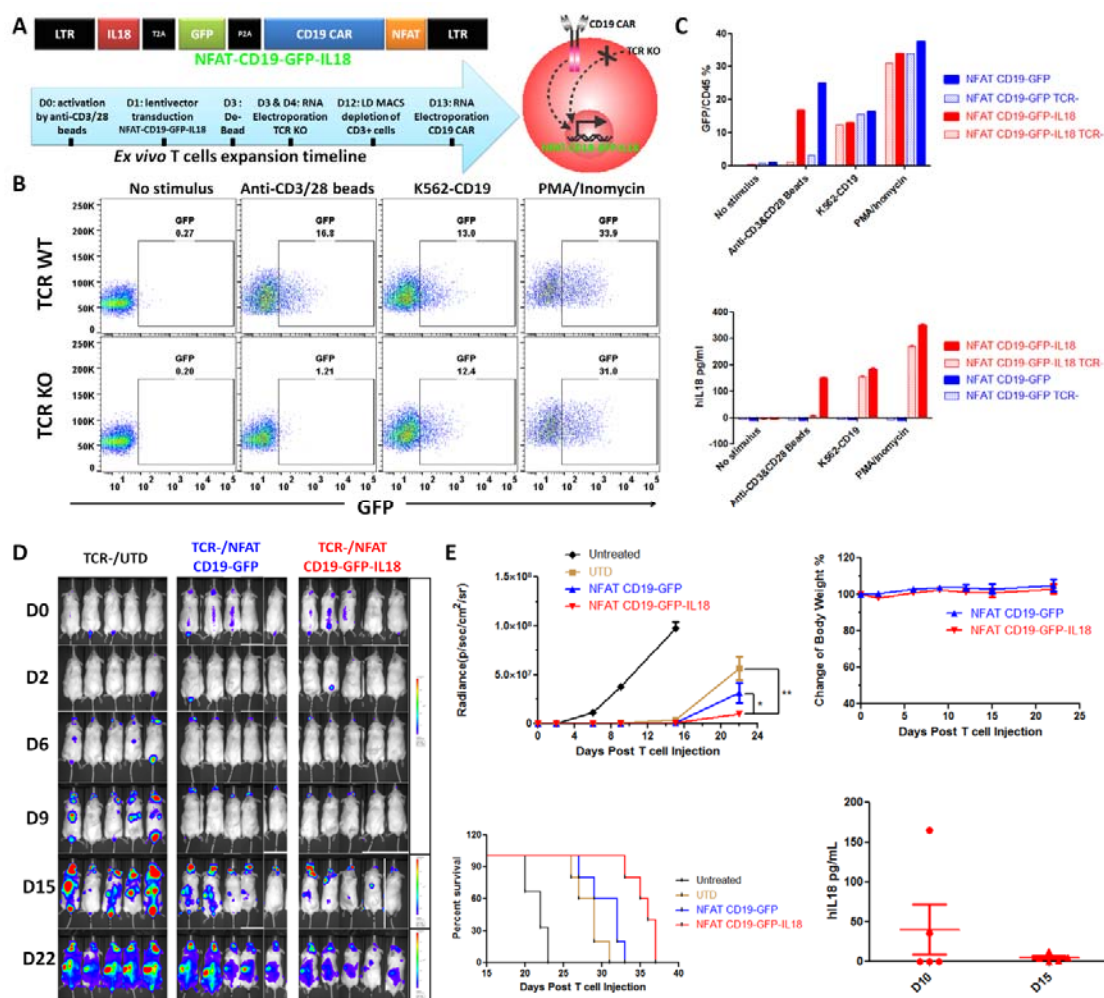

788

789 **Figure 6. An inducible system for IL18 expression in CART cells.** (A) Upper panel: schematic of  
 790 lentiviral construct in which the NFAT promoter drives expression of CD19-GFP-IL18. Lower  
 791 panel: the *ex vivo* timeline to generate TCR-deficient T cells transduced with NFAT-CD19-GFP-  
 792 IL18 and electroporated with mRNA CD19 CAR (designated as TCR-/NFAT-CD19-GFP-IL18). (B)  
 793 TCR-/NFAT-CD19-GFP-IL18 CART cells were stimulated with anti-CD3/28 beads, K562-CD19, or  
 794 PMA/ionomycin, after which CD45GFP+ cells were estimated by flowcytometry. (C) Summary of  
 795 GFP+/CD45+ percentages (upper panel) and IL18 concentrations (lower panel) under different  
 796 conditions as indicated. (D) NSG mice (n=5) were inoculated with 1X10<sup>6</sup> Nalm6-CBG/GFP cells,  
 797 and treated 1 week later with TCR-deficient untransduced, NFAT-CD19-GFP, or NFAT-CD19-GFP-  
 798 IL18 CART (all bearing mRNA encoded CD19 CAR). Tumor progression was monitored by live  
 799 animal imaging. (E) Tumor growth kinetics (Student's t-test: \*\*p=0.0057, \*p=0.0359), survival  
 800 rate after T cells infusion, change of body weight, and IL18 concentrations at D10 and D15  
 801 following T cell injection. All data with error bars are presented as mean±SEM.

802
